# Supplementary material for: Age and sex influence antibody profiles associated with tuberculosis progression
Source: PubMed Central journal article supplement (PMC11153143; doi:10.1038/s41564-024-01678-x), 2024-04-24
Supplement: 41564_2024_1678_MOESM1_ESM.pdf [file 41564_2024_1678_MOESM1_ESM.pdf]

## Reporting Summary

Nature Portfolio wishes to improve the reproducibility of the work that we publish. This form provides structure for consistency and transparency in reporting. For further information on Nature Portfolio policies, see our [Editorial Policies](#) and the [Editorial Policy Checklist](#).

### Statistics

For all statistical analyses, confirm that the following items are present in the figure legend, table legend, main text, or Methods section.

n/a Confirmed

- The exact sample size ( $n$ ) for each experimental group/condition, given as a discrete number and unit of measurement
- A statement on whether measurements were taken from distinct samples or whether the same sample was measured repeatedly
- The statistical test(s) used AND whether they are one- or two-sided  
*Only common tests should be described solely by name; describe more complex techniques in the Methods section.*
- A description of all covariates tested
- A description of any assumptions or corrections, such as tests of normality and adjustment for multiple comparisons
- A full description of the statistical parameters including central tendency (e.g. means) or other basic estimates (e.g. regression coefficient) AND variation (e.g. standard deviation) or associated estimates of uncertainty (e.g. confidence intervals)
- For null hypothesis testing, the test statistic (e.g.  $F$ ,  $t$ ,  $r$ ) with confidence intervals, effect sizes, degrees of freedom and  $P$  value noted  
*Give  $P$  values as exact values whenever suitable.*
- For Bayesian analysis, information on the choice of priors and Markov chain Monte Carlo settings
- For hierarchical and complex designs, identification of the appropriate level for tests and full reporting of outcomes
- Estimates of effect sizes (e.g. Cohen's  $d$ , Pearson's  $r$ ), indicating how they were calculated

*Our web collection on [statistics for biologists](#) contains articles on many of the points above.*

### Software and code

Policy information about [availability of computer code](#)

- Data collection
- Data analysis

For manuscripts utilizing custom algorithms or software that are central to the research but not yet described in published literature, software must be made available to editors and reviewers. We strongly encourage code deposition in a community repository (e.g. GitHub). See the Nature Portfolio [guidelines for submitting code & software](#) for further information.

## Data

Policy information about [availability of data](#)

All manuscripts must include a [data availability statement](#). This statement should provide the following information, where applicable:

- Accession codes, unique identifiers, or web links for publicly available datasets
- A description of any restrictions on data availability
- For clinical datasets or third party data, please ensure that the statement adheres to our [policy](#)

RISK6 scores included in analyses within the current manuscript were previously calculated for both the ACS cohort (ref 15) and the GC6 cohort (GEO Accession number: GSE94438). All data generated as part of this manuscript will be available in the main text or the supplementary materials. No custom biological materials were generated during the course of this research. All samples were obtained from the researchers who conducted the original ACS and GC6 observational studies, all of whom can be contacted about sample availability from the respective cohorts.

## Research involving human participants, their data, or biological material

Policy information about studies with [human participants or human data](#). See also policy information about [sex, gender \(identity/presentation\), and sexual orientation](#) and [race, ethnicity and racism](#).

Reporting on sex and gender

Both male and female participants, by self-reported sex, were included in both ACS and GC6 studies. Included participants from ACS were 67.1% female, and those from GC6 were 58.7% female. Sex-stratified analyses of the measured Mtb-specific antibody responses are key findings presented in the manuscript, and they are shown in Figures 3 and 5.

Reporting on race, ethnicity, or other socially relevant groupings

NA

Population characteristics

ACS is a cohort of HIV-negative South African adolescents aged 12-18 years. GC6 is a cohort of HIV-negative people aged 10-60 years who had household exposure to an adult with sputum smear-positive TB, and all included participants here were from South Africa. Available demographic data for each cohort is described in Supplementary Tables 1 and 2.

Recruitment

See <https://www.ncbi.nlm.nih.gov/pmc/articles/PMC5392204/#SD2>

Ethics oversight

All clinical research performed in this study was performed in accordance with the Declaration of Helsinki. The clinical samples analyzed in this manuscript were collected as part of the original ACS and GC6-74 observational studies and are described in detail in the original publication and in the Experimental Design section. Samples were collected at all sites only after written informed consent was given by the patients' legal guardian. Subjects in ACS were compensated an amount of R50 (approximately 7 US dollars) in the form of a non-cash payment such as a voucher at every occasion of a blood draw. Subjects in GC6 were compensated for loss of income and transport costs incurred due to research visits. For the ACS cohort study, protocols were approved by the University of Cape Town Research Ethics Committee, Cape Town, South Africa. For the GC6-74 study, protocols were approved by the institutional review boards of Stellenbosch University, Case Western Reserve University, the Uganda National Council for Science and Technology, and the Joint Gambian Government/MRC Ethics Committee. The systems serology analysis was approved by Massachusetts General Hospital.

Note that full information on the approval of the study protocol must also be provided in the manuscript.

## Field-specific reporting

Please select the one below that is the best fit for your research. If you are not sure, read the appropriate sections before making your selection.

- Life sciences  Behavioural & social sciences  Ecological, evolutionary & environmental sciences

For a reference copy of the document with all sections, see [nature.com/documents/nr-reporting-summary-flat.pdf](https://www.nature.com/documents/nr-reporting-summary-flat.pdf)

## Life sciences study design

All studies must disclose on these points even when the disclosure is negative.

Sample size

Sample size was determined based on sample availability at the clinical sites where the ACS and G6-74 studies were conducted.

Data exclusions

Raw data were excluded if they failed to meet quality control measures, specifically if the Luminex bead count was less than 20 for a given data point. Otherwise, no data were excluded.

Replication

All assays were performed in two technical replicates, or two biological replicates where applicable, and strong correlation between replicates was confirmed as part of quality control of raw data. The univariate and multivariate antibody signatures identified as associated with progression in the ACS cohort were validated in a second cohort, GC6.

Randomization

Participant allocation was not random, but rather included matched cases and controls. ACS and GC6 were both conducted as large

|               |                                                                                                                                                                                                                                                                               |
|---------------|-------------------------------------------------------------------------------------------------------------------------------------------------------------------------------------------------------------------------------------------------------------------------------|
| Randomization | prospective cohort studies. A number of individuals within each study progressed to active TB within the study period. All available samples from these progressors were included in the current study, as well as non-progressors matched by available demographic features. |
| Blinding      | Investigators were blinded as to progressor/non-progressor status during experimental data collection. We performed a supervised computational analysis, and thus analysis was not performed in a blinded manner.                                                             |

## Reporting for specific materials, systems and methods

We require information from authors about some types of materials, experimental systems and methods used in many studies. Here, indicate whether each material, system or method listed is relevant to your study. If you are not sure if a list item applies to your research, read the appropriate section before selecting a response.

### Materials & experimental systems

| n/a                                 | Included in the study                                            |
|-------------------------------------|------------------------------------------------------------------|
| <input type="checkbox"/>            | <input checked="" type="checkbox"/> Antibodies                   |
| <input type="checkbox"/>            | <input checked="" type="checkbox"/> Eukaryotic cell lines        |
| <input checked="" type="checkbox"/> | <input type="checkbox"/> Palaeontology and archaeology           |
| <input checked="" type="checkbox"/> | <input type="checkbox"/> Animals and other organisms             |
| <input checked="" type="checkbox"/> | <input type="checkbox"/> Clinical data                           |
| <input type="checkbox"/>            | <input checked="" type="checkbox"/> Dual use research of concern |
| <input checked="" type="checkbox"/> | <input type="checkbox"/> Plants                                  |

### Methods

| n/a                                 | Included in the study                           |
|-------------------------------------|-------------------------------------------------|
| <input checked="" type="checkbox"/> | <input type="checkbox"/> ChIP-seq               |
| <input checked="" type="checkbox"/> | <input type="checkbox"/> Flow cytometry         |
| <input checked="" type="checkbox"/> | <input type="checkbox"/> MRI-based neuroimaging |

## Antibodies

|                 |                                                                                                                                                                                                                                                                                                     |
|-----------------|-----------------------------------------------------------------------------------------------------------------------------------------------------------------------------------------------------------------------------------------------------------------------------------------------------|
| Antibodies used | Phycoerythrin (PE)-conjugated goat anti-human antibodies from Southern Biotech: IgG (9040-09), IgG1 (9052-09), IgG2 (9070-09), IgG3 (9210-09), IgG4 (9200-09), IgA1 (9130-09), IgA2 (9140-09), and IgM (9020-09). Anti-human CD66b antibody from BioLegend (305112).                                |
| Validation      | All antibodies used were validated by the manufacturers. RRID numbers are available for all antibody reagents as follows: AB_2796601 (IgG), AB_2796621 (IgG1), AB_2796639 (IgG2), AB_2796701 (IgG3), AB_2796693 (IgG4), AB_2796656 (IgA1), AB_2796664 (IgA2), AB_2796577 (IgM), AB_2563294 (CD66b). |

## Eukaryotic cell lines

Policy information about [cell lines and Sex and Gender in Research](#)

|                                                                   |                                                                                           |
|-------------------------------------------------------------------|-------------------------------------------------------------------------------------------|
| Cell line source(s)                                               | THP-1 cells (human acute monocytic leukemia cell line, American Type Culture Collection); |
| Authentication                                                    | Cell lines were not authenticated after purchase.                                         |
| Mycoplasma contamination                                          | Cell lines were not tested for mycoplasma contamination.                                  |
| Commonly misidentified lines (See <a href="#">ICLAC</a> register) | No commonly misidentified cell lines were used in this study.                             |
